# Supplementary material for: A series of divalent metal coordination polymers based on isomeric tetracarboxylic acids: synthesis, structures and magnetic properties
Source: Royal Society of Chemistry journal article supplement (doi:10.1039/c4dt01946f), 2014-01-01
Supplement: c4dt01946f1.pdf [file c4dt01946f1.pdf]

**Electronic Supplementary Information for**

**A series of divalent metal coordination polymers based on  
isomeric tetracarboxylic acid: Syntheses, structures and  
magnetic properties**

**Min-Le Han<sup>a,b</sup>, Ya-Ping Duan<sup>a</sup>, Dong-Sheng Li<sup>a\*</sup>, Guo-Wang Xu<sup>a</sup>, Ya-Pan Wu<sup>a</sup>, Jun Zhao<sup>a</sup>**

*<sup>a</sup> College of Materials & Chemical Engineering, Collaborative Innovation Center for Microgrid of  
New Energy of Hubei Province, China Three Gorges University, Yichang, 443002, China. Tel./Fax:*

*+86-717- 6397506; E-mail address: lidongsheng1@126.com (D.-S. Li).*

*<sup>b</sup>College of Chemistry and Chemical Engineering, Luoyang Normal University, Luoyang 471022,  
China.*

**Dalton**

**Table S1.** Selected Bond Lengths (Å) and Angles (°) for **1–5<sup>a</sup>**.

| <b>1</b>            |            |                     |            |
|---------------------|------------|---------------------|------------|
| Mn(1)-O(1)          | 2.1047(18) | Mn(1)-O(5)#1        | 2.1206(17) |
| Mn(1)-O(10)         | 2.204(2)   | Mn(1)-O(9)          | 2.2120(17) |
| Mn(1)-N(2)          | 2.283(2)   | Mn(1)-N(1)          | 2.292(2)   |
| O(1)-Mn(1)-O(5)#1   | 100.22(8)  | O(1)-Mn(1)-O(10)    | 90.52(9)   |
| O(5)#1-Mn(1)-O(10)  | 89.69(7)   | O(1)-Mn(1)-O(9)     | 91.43(8)   |
| O(5)#1-Mn(1)-O(9)   | 87.28(7)   | O(10)-Mn(1)-O(9)    | 176.64(7)  |
| O(1)-Mn(1)-N(2)     | 164.85(8)  | O(5)#1-Mn(1)-N(2)   | 94.92(8)   |
| O(10)-Mn(1)-N(2)    | 89.49(10)  | O(9)-Mn(1)-N(2)     | 89.33(8)   |
| O(1)-Mn(1)-N(1)     | 92.59(8)   | O(5)#1-Mn(1)-N(1)   | 166.77(7)  |
| O(10)-Mn(1)-N(1)    | 93.49(8)   | O(9)-Mn(1)-N(1)     | 89.15(7)   |
| N(2)-Mn(1)-N(1)     | 72.29(9)   |                     |            |
| <b>2</b>            |            |                     |            |
| Co(1)-O(5)#1        | 2.059(3)   | Co(1)-O(1)          | 2.059(2)   |
| Co(1)-N(1)          | 2.094(3)   | Co(1)-O(9)          | 2.109(3)   |
| Co(1)-O(10)         | 2.127(3)   | Co(1)-O(4)#1        | 2.205(3)   |
| O(5)#1-Co(1)-O(1)   | 95.21(11)  | O(5)#1-Co(1)-N(1)   | 172.07(13) |
| O(1)-Co(1)-N(1)     | 91.05(12)  | O(5)#1-Co(1)-O(9)   | 83.01(13)  |
| O(1)-Co(1)-O(9)     | 175.98(11) | N(1)-Co(1)-O(9)     | 91.04(14)  |
| O(5)#1-Co(1)-O(10)  | 91.62(11)  | O(1)-Co(1)-O(10)    | 89.55(11)  |
| N(1)-Co(1)-O(10)    | 93.30(12)  | O(9)-Co(1)-O(10)    | 86.90(12)  |
| O(5)#1-Co(1)-O(4)#1 | 85.97(11)  | O(1)-Co(1)-O(4)#1   | 91.10(11)  |
| N(1)-Co(1)-O(4)#1   | 89.05(12)  | O(9)-Co(1)-O(4)#1   | 92.38(12)  |
| O(10)-Co(1)-O(4)#1  | 177.56(11) |                     |            |
| <b>3</b>            |            |                     |            |
| Co(1)-O(1)          | 2.0605(19) | Co(1)-O(6)#1        | 2.077(2)   |
| Co(1)-O(10)         | 2.087(2)   | Co(1)-N(1)          | 2.089(3)   |
| Co(1)-O(9)          | 2.143(2)   | Co(1)-O(7)#1        | 2.2034(19) |
| O(1)-Co(1)-O(6)#1   | 94.19(8)   | O(1)-Co(1)-O(10)    | 177.68(8)  |
| O(6)#1-Co(1)-O(10)  | 84.64(9)   | O(1)-Co(1)-N(1)     | 91.47(9)   |
| O(6)#1-Co(1)-N(1)   | 173.60(9)  | O(10)-Co(1)-N(1)    | 89.81(10)  |
| O(1)-Co(1)-O(9)     | 88.06(8)   | O(6)#1-Co(1)-O(9)   | 88.82(8)   |
| O(10)-Co(1)-O(9)    | 89.91(8)   | N(1)-Co(1)-O(9)     | 94.36(9)   |
| O(1)-Co(1)-O(7)#1   | 89.17(8)   | O(6)#1-Co(1)-O(7)#1 | 85.64(8)   |
| O(10)-Co(1)-O(7)#1  | 92.73(8)   | N(1)-Co(1)-O(7)#1   | 91.47(9)   |
| O(9)-Co(1)-O(7)#1   | 173.61(8)  |                     |            |
| <b>4</b>            |            |                     |            |
| Ni(1)-O(1)#1        | 2.041(2)   | Ni(1)-O(1)          | 2.041(2)   |
| Ni(1)-N(3)#2        | 2.094(2)   | Ni(1)-N(3)#3        | 2.094(2)   |
| Ni(1)-O(9)#1        | 2.110(2)   | Ni(1)-O(9)          | 2.110(2)   |
| Ni(2)-O(2)          | 2.032(2)   | Ni(2)-O(3)          | 2.043(2)   |
| Ni(2)-N(1)          | 2.063(2)   | Ni(2)-O(7)#2        | 2.075(2)   |
| Ni(2)-O(10)         | 2.137(2)   | Ni(2)-O(8)#2        | 2.185(2)   |

|                      |            |                      |            |
|----------------------|------------|----------------------|------------|
| Ni(3)-O(11)#4        | 2.041(2)   | Ni(3)-O(11)          | 2.041(2)   |
| Ni(3)-O(6)#5         | 2.059(2)   | Ni(3)-O(6)#6         | 2.059(2)   |
| Ni(3)-O(4)#4         | 2.090(2)   | Ni(3)-O(4)           | 2.090(2)   |
| O(1)#1-Ni(1)-O(1)    | 180.0      | O(1)#1-Ni(1)-N(3)#2  | 87.46(9)   |
| O(1)-Ni(1)-N(3)#2    | 92.54(9)   | O(1)#1-Ni(1)-N(3)#3  | 92.54(10)  |
| O(1)-Ni(1)-N(3)#3    | 87.46(9)   | N(3)#2-Ni(1)-N(3)#3  | 180.000(1) |
| O(1)#1-Ni(1)-O(9)#1  | 85.56(8)   | O(1)-Ni(1)-O(9)#1    | 94.44(8)   |
| N(3)#2-Ni(1)-O(9)#1  | 84.90(8)   | N(3)#3-Ni(1)-O(9)#1  | 95.10(8)   |
| O(1)#1-Ni(1)-O(9)    | 94.44(8)   | O(1)-Ni(1)-O(9)      | 85.56(8)   |
| N(3)#2-Ni(1)-O(9)    | 95.10(8)   | N(3)#3-Ni(1)-O(9)    | 84.90(8)   |
| O(9)#1-Ni(1)-O(9)    | 180.000(1) | O(2)-Ni(2)-O(3)      | 91.04(10)  |
| O(2)-Ni(2)-N(1)      | 92.51(9)   | O(3)-Ni(2)-N(1)      | 99.69(9)   |
| O(2)-Ni(2)-O(7)#2    | 90.31(9)   | O(3)-Ni(2)-O(7)#2    | 89.16(8)   |
| N(1)-Ni(2)-O(7)#2    | 170.66(9)  | O(2)-Ni(2)-O(10)     | 176.68(9)  |
| N(1)-Ni(2)-O(10)     | 89.99(10)  | O(7)#2-Ni(2)-O(10)   | 86.89(9)   |
| O(2)-Ni(2)-O(8)#2    | 82.36(9)   | O(3)-Ni(2)-O(8)#2    | 150.18(8)  |
| N(1)-Ni(2)-O(8)#2    | 109.60(9)  | O(7)#2-Ni(2)-O(8)#2  | 61.97(8)   |
| O(10)-Ni(2)-O(8)#2   | 94.73(10)  | O(3)-Ni(2)-O(10)     | 90.70(10)  |
| O(11)#4-Ni(3)-O(6)#5 | 92.86(9)   | O(11)#4-Ni(3)-O(11)  | 180.00(9)  |
| O(11)#4-Ni(3)-O(6)#6 | 87.14(9)   | O(11)-Ni(3)-O(6)#5   | 87.14(9)   |
| O(6)#5-Ni(3)-O(6)#6  | 180.0      | O(11)-Ni(3)-O(6)#6   | 92.86(9)   |
| O(11)-Ni(3)-O(4)#4   | 91.73(8)   | O(11)#4-Ni(3)-O(4)#4 | 88.27(8)   |
| O(6)#6-Ni(3)-O(4)#4  | 90.94(9)   | O(6)#5-Ni(3)-O(4)#4  | 89.06(9)   |
| O(11)-Ni(3)-O(4)     | 88.27(8)   | O(11)#4-Ni(3)-O(4)   | 91.73(8)   |
| O(6)#6-Ni(3)-O(4)    | 89.06(9)   | O(6)#5-Ni(3)-O(4)    | 90.94(9)   |
| O(4)#4-Ni(3)-O(4)    | 180.00(9)  |                      |            |
| <b>5</b>             |            |                      |            |
| Co(1)-O(9)#1         | 2.069(2)   | Co(1)-O(9)           | 2.069(2)   |
| Co(1)-O(2)#1         | 2.108(2)   | Co(1)-O(2)           | 2.108(2)   |
| Co(1)-O(6)#2         | 2.120(2)   | Co(1)-O(6)#3         | 2.120(2)   |
| Co(2)-O(10)#4        | 2.0853(18) | Co(2)-O(10)          | 2.0853(18) |
| Co(2)-O(4)#4         | 2.0958(19) | Co(2)-O(4)           | 2.0958(19) |
| Co(2)-O(8)#5         | 2.110(2)   | Co(2)-O(8)#6         | 2.110(2)   |
| Co(3)-O(10)#7        | 2.0761(17) | Co(3)-O(10)          | 2.0873(18) |
| Co(3)-O(7)#8         | 2.0821(19) | Co(3)-O(3)#4         | 2.0974(18) |
| Co(3)-O(12)          | 2.160(2)   | Co(3)-O(11)          | 2.1678(19) |
| O(9)#1-Co(1)-O(9)    | 180.00(5)  | O(9)#1-Co(1)-O(2)#1  | 89.24(8)   |
| O(9)-Co(1)-O(2)#1    | 90.76(8)   | O(9)#1-Co(1)-O(2)    | 90.76(8)   |
| O(9)-Co(1)-O(2)      | 89.24(8)   | O(2)#1-Co(1)-O(2)    | 180.00(9)  |
| O(9)#1-Co(1)-O(6)#2  | 91.89(8)   | O(9)-Co(1)-O(6)#2    | 88.11(8)   |
| O(2)#1-Co(1)-O(6)#2  | 90.13(9)   | O(2)-Co(1)-O(6)#2    | 89.87(9)   |
| O(9)#1-Co(1)-O(6)#3  | 88.11(8)   | O(9)-Co(1)-O(6)#3    | 91.89(8)   |
| O(2)#1-Co(1)-O(6)#3  | 89.87(9)   | O(2)-Co(1)-O(6)#3    | 90.13(9)   |

---

|                      |            |                      |           |
|----------------------|------------|----------------------|-----------|
| O(6)#2-Co(1)-O(6)#3  | 180.000(1) | O(10)-Co(2)-O(10)#4  | 180.00(2) |
|                      | 86.21(6)   | O(10)#4-Co(2)-O(4)   | 93.79(6)  |
| O(10)-Co(2)-O(4)     |            |                      |           |
| O(10)-Co(2)-O(4)#4   | 93.79(6)   | O(10)#4-Co(2)-O(4)#4 | 86.21(6)  |
| O(4)-Co(2)-O(4)#4    | 180.00(9)  | O(10)-Co(2)-O(8)#5   | 84.58(6)  |
| O(10)#4-Co(2)-O(8)#5 | 95.42(6)   | O(4)-Co(2)-O(8)#5    | 89.85(8)  |
| O(4)#4-Co(2)-O(8)#5  | 90.15(8)   | O(10)-Co(2)-O(8)#6   | 95.42(6)  |
| O(10)#4-Co(2)-O(8)#6 | 84.58(6)   | O(4)-Co(2)-O(8)#6    | 90.15(8)  |
|                      |            |                      | 180.0     |
| O(4)#4-Co(2)-O(8)#6  | 89.85(8)   | O(8)#5-Co(2)-O(8)#6  |           |
|                      |            |                      |           |
| O(10)#7-Co(3)-O(7)#8 | 95.53(7)   | O(10)#7-Co(3)-O(10)  | 84.87(7)  |
| O(7)#8-Co(3)-O(10)   | 93.12(7)   | O(10)#7-Co(3)-O(3)#4 | 92.08(7)  |
| O(7)#8-Co(3)-O(3)#4  | 168.77(7)  | O(10)-Co(3)-O(3)#4   | 95.78(7)  |
| O(10)#7-Co(3)-O(12)  | 92.09(8)   | O(7)#8-Co(3)-O(12)   | 90.97(8)  |
| O(10)-Co(3)-O(12)    | 175.12(7)  | O(3)#4-Co(3)-O(12)   | 80.49(8)  |
| O(10)#7-Co(3)-O(11)  | 175.04(7)  | O(7)#8-Co(3)-O(11)   | 82.26(8)  |
| O(10)-Co(3)-O(11)    | 90.80(7)   | O(12)-Co(3)-O(11)    | 92.39(9)  |
| O(3)#4-Co(3)-O(11)   | 90.76(8)   |                      |           |

---

<sup>a</sup> Symmetry codes: **1**: #1:  $x + 1, y + 1, z$ ; **2**: #1:  $-x, -y + 1, -z + 1$ ; **3**: #1:  $-x, -y + 1, -z + 1$ ; **4**: #1:  $-x + 1, -y + 2, -z + 1$ ; #2:  $x, -y + 3/2, z + 1/2$ ; #3:  $-x + 1, y + 1/2, -z + 1/2$ ; #4:  $-x, -y + 2, -z + 1$ ; #5:  $x, -y + 5/2, z + 1/2$ ; #6:  $-x, y - 1/2, -z + 1/2$ ; **5**: #1:  $-x + 2, -y - 1, -z + 1$ ; #2:  $x, -y - 1/2, z + 1/2$ ; #3:  $-x + 2, y - 1/2, -z + 1/2$ ; #4:  $-x + 1, -y, -z + 1$ ; #5:  $x, -y + 1/2, z + 1/2$ ; #6:  $-x + 1, y - 1/2, -z + 1/2$ ; #7:  $-x + 1, -y + 1, -z + 1$ ; #8:  $-x + 1, y + 1/2, -z + 1/2$ .

**Table S2.** Distance (Å) and angles (°) of hydrogen bonding for **1–3**<sup>a</sup>.

| D-H···A               | d(D-H)    | d(H···A)  | d(D···A) | ∠ (DHA) |
|-----------------------|-----------|-----------|----------|---------|
| <b>1</b>              |           |           |          |         |
| O(3)-H(3A)···O(2)     | 0.881(18) | 1.530(19) | 2.410(3) | 177(4)  |
| O(7)-H(7A)···O(4)#3   | 0.851(18) | 1.74(2)   | 2.580(3) | 169(4)  |
| O(9)-H(9A)···O(2)#4   | 0.833(16) | 1.985(18) | 2.813(3) | 173(3)  |
| O(9)-H(9B)···O(5)#5   | 0.860(16) | 1.98(2)   | 2.811(3) | 161(3)  |
| O(10)-H(10B)···O(8)#6 | 0.89      | 1.99      | 2.876(3) | 168.6   |
| O(10)-H(10A)···O(6)#1 | 0.90      | 1.78      | 2.660(3) | 164.3   |
| <b>2</b>              |           |           |          |         |
| O(11)-H(11B)···O(1)#3 | 0.85      | 2.35      | 3.126(8) | 152.9   |
| O(11)-H(11A)···N(3)   | 0.85      | 2.15      | 3.003(8) | 176.0   |
| O(10)-H(10B)···O(2)   | 0.85      | 2.16      | 2.823(4) | 134.1   |
| O(10)-H(10A)···O(8)#3 | 0.85      | 2.03      | 2.855(5) | 163.6   |
| O(9)-H(9B)···O(8)#3   | 0.85      | 2.34      | 3.128(5) | 155.4   |
| O(9)-H(9A)···O(5)#4   | 0.85      | 1.80      | 2.651(5) | 179.2   |
| O(7)-H(7A)···O(6)#5   | 0.85      | 1.72      | 2.571(4) | 175.9   |
| O(3)-H(3A)···O(2)#6   | 0.85      | 1.68      | 2.501(4) | 162.2   |
| <b>3</b>              |           |           |          |         |
| O(10)-H(10A)···O(3)#3 | 0.85      | 2.06      | 2.869(3) | 158.8   |
| O(10)-H(10B)···O(6)#4 | 0.85      | 1.90      | 2.701(3) | 157.2   |
| O(9)-H(9B)···O(3)#3   | 0.85      | 2.57      | 2.996(3) | 112.0   |
| O(9)-H(9B)···O(5)#5   | 0.85      | 2.36      | 3.056(3) | 139.6   |
| O(9)-H(9A)···O(2)     | 0.85      | 1.97      | 2.739(3) | 149.2   |
| O(8)-H(8A)···O(2)#6   | 0.82      | 1.71      | 2.519(3) | 167.9   |
| O(4)-H(4A)···O(5)#7   | 0.82      | 1.76      | 2.573(3) | 173.0   |

<sup>a</sup> Symmetry codes: **1**:  $x + 1, y + 1, z$ ; #3:  $x, y, z + 1$ ; #4:  $-x + 1, -y + 1, -z$ ; #5:  $-x, -y, -z$ ; #6:  $-x + 1, -y, -z + 1$ ; **2**: #3:  $-x + 1/2, -y + 3/2, -z + 1$ ; #4:  $x + 1/2, -y + 3/2, z + 1/2$ ; #5:  $-x, y + 1, -z + 1/2$ ; #6:  $-x, -y, -z + 1$ ; **3**: #3:  $-x + 1/2, -y + 1/2, -z + 1$ ; #4:  $x + 1/2, -y + 1/2, z + 1/2$ ; #5:  $x + 1/2, -y + 3/2, z + 1/2$ ; #6:  $-x, -y + 2, -z + 1$ ; #7:  $-x, y - 1, -z + 1/2$ .

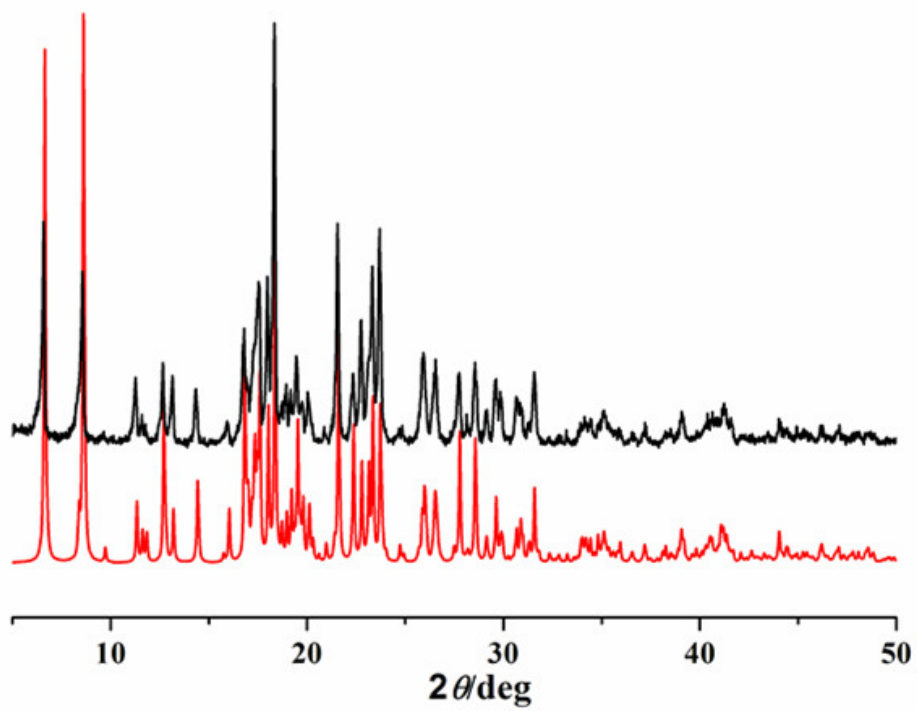

1

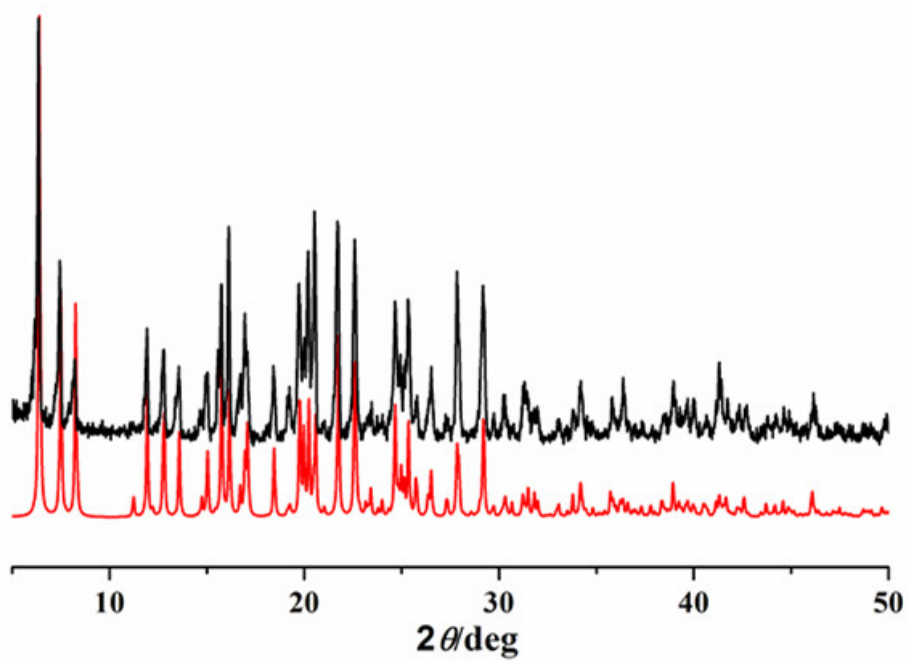

2

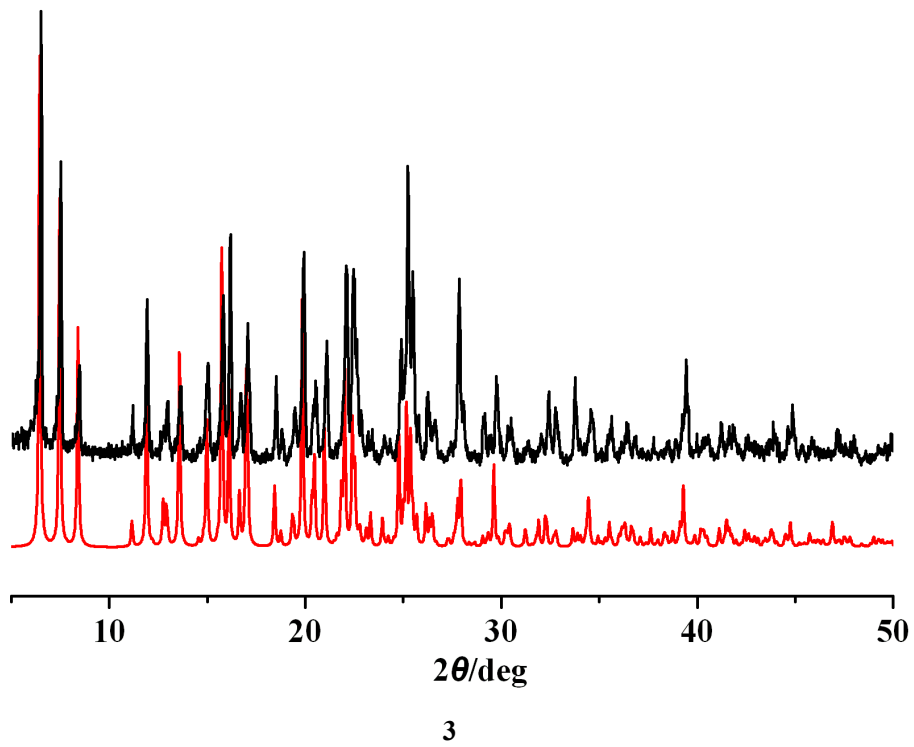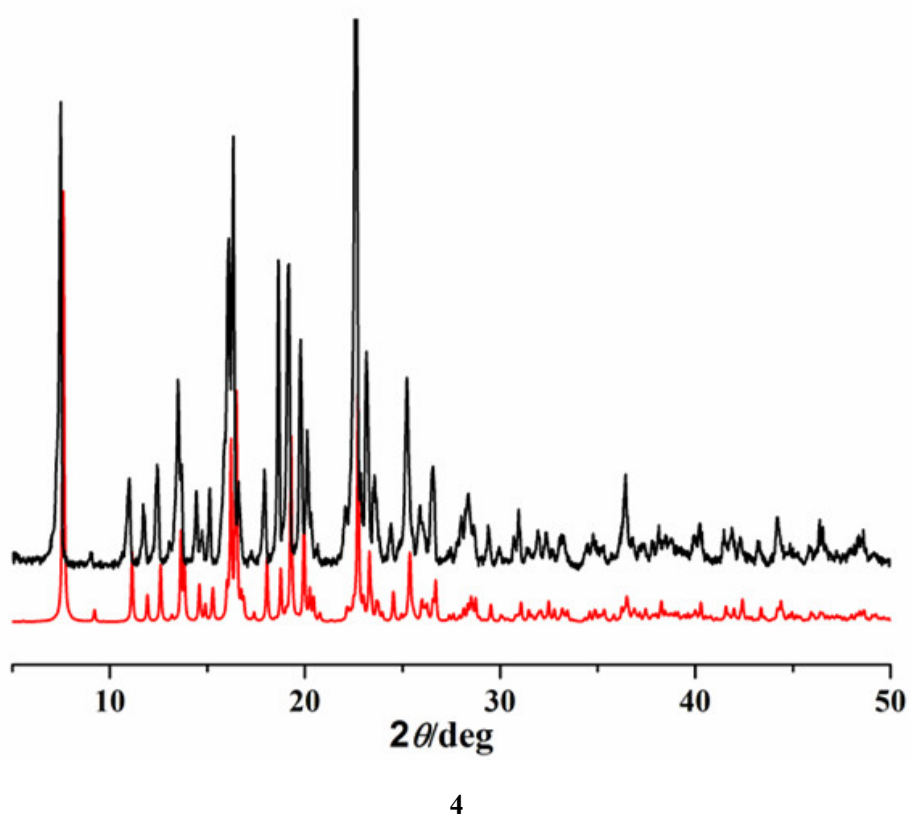

**Figure S1.** Comparison of the experimental and simulated PXR D patterns. In each case, the top is the experimental pattern and the bottom is the simulated one.

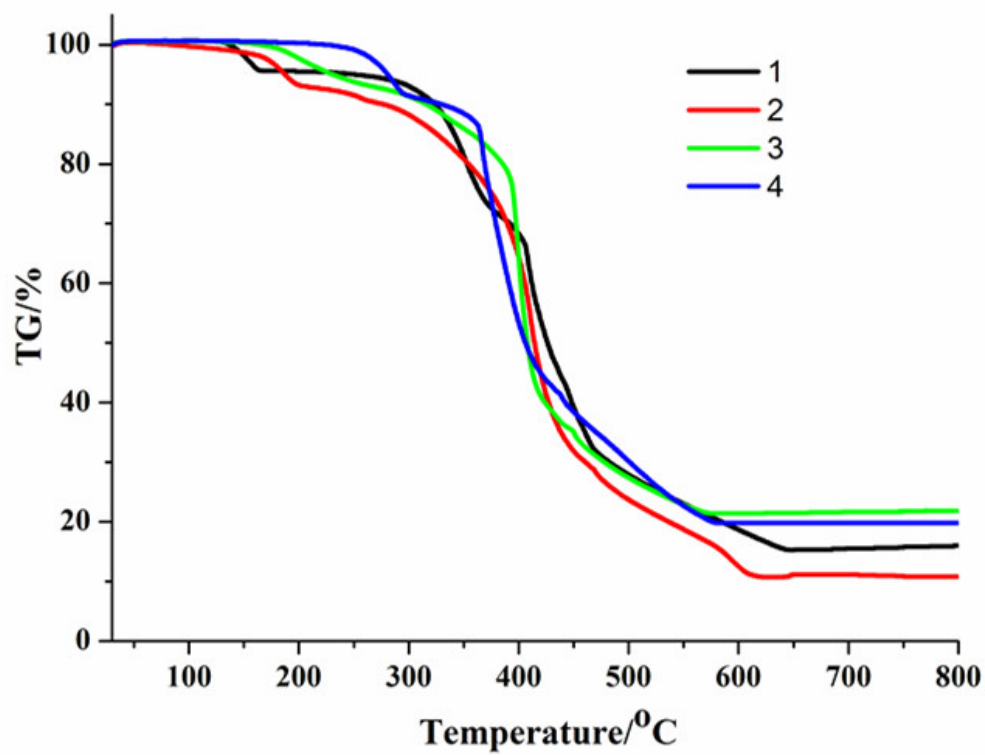

Figure S2. TGA plots of complexes 1–4.
